# Supplementary material
Source: PubMed Central journal article supplement (PMC5423851)
Supplement: NIHMS837516-supplement-01.pdf [file NIHMS837516-supplement-01.pdf]

### Supplemental Table 1. Additional References Reviewed, Categorized and Analyzed

- Adamson, M. A., Vincent, A. A., & Cundiff, J. (2009). Common ground, not a battle ground. violence prevention at a detoxification facility. *Journal of Psychosocial Nursing and Mental Health Services*, 47(8), 28-35. doi:10.3928/02793695-20090706-01
- Adgate, J. L., Clayton, C. A., Quackenboss, J. J., Thomas, K. W., Whitmore, R. W., Pellizzari, E. D., ... Sexton, K. (2000). Measurement of multi-pollutant and multi-pathway exposures in a probability-based sample of children: practical strategies for effective field studies. *Journal of Exposure Analysis and Environmental Epidemiology*, 10, 650-661.
- Agency for Toxic Substances and Disease Registry. (2001, February). *Guidance Manual for the Assessment of Joint Toxic Action of Chemical Mixtures*. Atlanta, GA: Author.
- Agnew, J. (2001). Scientific Foundations of Occupational and Environmental Health Nursing Practice. In M. K. Salazar (Ed.), *Core Curriculum for Occupational & Environmental Health Nursing* (2nd ed., pp. 111-145). Philadelphia, PA: W. B. Saunders Company.
- Aitio, A. (1988). Biological Monitoring. In T. W. Clarkson, L. Friberg, G. F. Nordberg, & P. R. Sager (Eds.), *Biological Monitoring of Toxic Metals* (pp. 75-81). New York, NY: Plenum Press.
- Akansel, N., & Kaymakçi, S. (2008). Effects of intensive care unit noise on patients: A study on coronary artery bypass graft surgery patients. *Journal of Clinical Nursing*, 17(12), 1581-1590. doi:10.1111/j.1365-2702.2007.02144.x
- Akkerman, S., & Bakker, A. (2011). Boundary Crossing and Boundary Objects. *Review of Educational Research*, 81(2), 132-169. doi:10.3102/0034654311404435
- Albertini, R., Bird, M., Doerrer, N., Needham, L., Robison, S., Sheldon, L., & Zenick, H. (2006, November). The Use of Biomonitoring Data in Exposure and Human Health Risk Assessments. *Environmental Health Perspectives*, 114(11), 1755-1762. doi:10.1289/ehp.9056
- Alliance of Nurses for Healthy Environments. (2009). *Environmental Health Competencies for Nurses*. Mount Rainier, MD: Author.
- American Industrial Hygiene Association. (2015). *Body of Knowledge: Indoor Air Quality Practitioner*. Falls Church, VA: Author.
- American Industrial Hygiene Association. (2007, August 16). *What Is Industrial Hygiene?* <http://www.abih.org/content/ih-defined>
- American Industrial Hygiene Association. (2006). *A Strategy for Assessing and Managing Occupational Exposures*, 3<sup>rd</sup> Ed. Falls Church, VA: Author.
- Anderko, L., Braun, J., & Auinger, P. (2010). Contribution of tobacco smoke exposure to learning disabilities. *Journal of Obstetric, Gynecologic, and Neonatal Nursing: JOGNN / NAACOG*, 39(1), 111-117. doi:10.1111/j.1552-6909.2009.01093.x
- Apostolopoulos, Y., Sönmez, S., Shattell, M., & Kronenfeld, J. (2012). Sex work in trucking milieu: "lot lizards," truckers, and risk. *Nursing Forum*, 47(3), 140-152. doi:10.1111/j.1744-6198.2012.00272.x
- Ashford, N. A. (1999). A Conceptual Framework for the Use of the Precautionary Principle in Law. In C. Raffensperger & J. Tickner (Eds.), *Protecting Public Health & the Environment: Implementing the Precautionary Principle* (pp. 198-206). Washington, DC: Island Press.
- Ashforth, B., Kreiner, G., & Fugate, M. (2000). All in a Day's Work: Boundaries and Micro Role Transitions. *The Academy of Management Review*, 25(3), 472-491.

- Azmoon, H., Dehghan, H., Akbari, J., & Souri, S. (2013). The relationship between thermal comfort and light intensity with sleep quality and eye tiredness in shift work nurses. *Journal of Environmental and Public Health*, 2013, 639184-639184. doi:10.1155/2013/639184
- Bailey, K. (2007). *Boundary Maintenance in Living Systems Theory and Social Entropy Theory*. Los Angeles, CA: University of California.
- Bartell, S. (2005). Risk Assessment. In H. Frumkin (Ed.), *Environmental Health from global to local* (pp. 940-960). San Francisco, CA: Jossey-Bass.
- Barton, C. A. (2008). *The measurement, partitioning and near-field modeling of perfluorooctanoate (PFO) in air*. University of Delaware. ProQuest 3329805.
- Becker, J., Méndez-Quigley, T., & Phillips, M. (2010). Nursing role in the pharmaceutical life cycle. *Nursing Administration Quarterly*, 34(4), 297-305. doi:10.1097/NAQ.0b013e3181f5640a
- Beckie, T. (2012). A Systematic Review of Allostatic Load, Health and Health Disparities. *Biological Research for Nursing*, 14(4), 311-346. doi:10.1177/1099800412455688
- Belson, M. G., Schier, J. G., & Patel, M. M. (2005, January 14). Case Definitions for Chemical Poisoning: Case Definitions for Potential Terrorism Agents: Toxins and Toxicants. *Morbidity and Mortality Weekly Report*, 54(RR-1), 1-5, 11-13.
- Benbenek, M. (2010). *Enablers and Barriers to Factors Contributing to Bone Health among Early Adolescent Somali Girls Living in Minnesota*. University of Minnesota. ProQuest 3434234.
- Bennett, D. H., McKone, T. E., Evans, J. S., Nazaroff, W. W., Margni, M. D., Jolliet, O., & Smith, K. R. (2002, May 1). Defining Intake Fraction. *Environmental Science & Technology*, 36(9), 206A-211A.
- Berglund, M., Lind, B., Bjornberg, K. A., Palm, B., Einarsson, O., & Vahter, M. (2005, October 3). Inter-individual variations of human mercury exposure biomarkers: a cross-sectional assessment. *Environmental Health*, 4(20), 1-11. doi:10.1186/1476-069X-4-20
- Berk, M. L. (1981). *The Limits of Medicine: the distribution of medical resources and its effect on health outcomes*. New York University. ProQuest 8115530.
- Boutain, D. M. (2005). Social Justice in Nursing: A Review of the Literature. In M. de Chesnay (Ed.) *Caring for the Vulnerable: Perspectives in Nursing Theory, Practice and Research*, (pp. 21-29). Sudbury, MA: Jones and Bartlett Publishers.
- Briggs, D. (2008). A framework for integrated environmental health impact assessment of systemic risks. *Environmental Health*, 7, 61-89. doi:10.1186/1476-069X07061
- Burket, T. L., Hippensteel, D., Penrod, J., & Resnick, B. (2013). Pilot testing of the function focused care intervention on an acute care trauma unit. *Geriatric Nursing*, 34(3), 241-246. doi:10.1016/j.gerinurse.2013.02.001
- Butler, M. (2014). *The influence of maternal contexts on infant outcomes, secondary analysis of WPCR data 2000-2010*. The University of Wisconsin - Milwaukee. ProQuest 3633330.
- Butterfield, P. (2002, September). Upstream Reflections on Environmental Health: An Abbreviated History and Framework for Action. *Advances in Nursing Science*, 25(1), 32-49.
- Butterfield, P., Hill, W., & Nelson, S. (2004, Spring). An environmental risk reduction study with rural families: linking conceptual and measurement phases of environmental health research. *Communicating Nursing Research*, 37, 131.

- Butterfield, P., & Postma, J. (2009). The TERRA framework: Conceptualizing rural environmental health inequities through an environmental justice lens. *ANS.Advances in Nursing Science*, 32(2), 107-117. doi:10.1097/ANS.0b013e3181a3ae93
- Calabrese, E. J., & Baldwin, L. A. (2003, February 13). Toxicology rethinks its central belief. *Nature*, 421, 691-692. doi:10.1038/421691a
- Caraccio, T., & Mofenson, H. (1993). Pharmacokinetics. In P. Viccellio (Ed.), *Handbook of Medical Toxicology* (pp. 12-27). Boston, MA: Little, Brown and Company.
- Carlsson, N., Johansson, A., Hermansson, G., & Andersson-Gäre, B. (2010). Child health nurses' roles and attitudes in reducing children's tobacco smoke exposure. *Journal of Clinical Nursing*, 19(3-4), 507-516. doi:10.1111/j.1365-2702.2009.02847.x
- Cesario, S. K., & Hughes, L. A. (2007). Precocious puberty: a comprehensive review of literature. *Journal of Obstetric, Gynecologic, and Neonatal Nursing: JOGNN / NAACOG*, 36(3), 263-274.
- Chao, M., Kung, F., Yao, D. (2015). Understanding the divergent effects of multicultural exposure. *International Journal of Intercultural Relations*, 47, 78.
- Chalupka, S., & Chalupka, A. N. (2010). The impact of environmental and occupational exposures on reproductive health. *Journal of Obstetric, Gynecologic, and Neonatal Nursing*, 39(1), 84-100. doi:10.1111/j.1552-6909.2009.01091.x
- Checkoway, H., & Eisen, E. (2005). Epidemiology. In L. Rosenstock, M. R. Cullen, C. A. Brodtkin & C. A. Redlich (Eds.), *Textbook of Clinical Occupational and Environmental Medicine* (2nd ed., pp. 120-137). Philadelphia, PA: Elsevier Saunders.
- Chin, D.L. (2011). *Individual, Interpersonal, and Occupational Factors of Cigarette Smoking in Building Trade Workers*. San Francisco, CA: University of California.
- Cho, J., & Holditch-Davis, D. (2014). Effects of perinatal testosterone on infant health, mother-infant interactions, and infant development. *Biological Research for Nursing*, 16(2), 228-236. doi:10.1177/1099800413486340
- Choi, M., Afzal, B., & Sattler, B. (2006, September/October). Geographic information systems: a new tool for environmental health assessments. *Public Health Nursing*, 23(5), 381-391. doi:10.1111/j.1525-1446.2006.00577.x
- Choiniere, D. B. (2010). The effects of hospital noise. *Nursing Administration Quarterly*, 34(4), 327-333. doi:10.1097/NAQ.0b013e3181f563db
- Christensen, M. (2007). Noise levels in a general intensive care unit: a descriptive study. *Nursing In Critical Care*, 12(4), 188-197.
- Clark, N. M. (2005). Population Health and the Environment. In T. J. Goehl (Ed.), *Essay on the Future of Environmental Health Research* (pp. 138-147). Research Triangle Park, NC: Environmental Health Perspectives.
- Clayton, G. D. (1973). Introduction to Industrial Hygiene. In G. D. Clayton, & W. D. Kelley (Eds.), *The Industrial Environment: its Evaluation and Control* (pp. 1-5). Washington, DC: U.S. Government Printing Office.
- Collins, K. (2007, November). Healthcare Workers' Perceptions of Occupational Hazards - Asking Questions to Guide Practice. *AAOHN Journal*, 55(11), 437-440.

- Connor, N., Monk, P., & Murray, V. (2000, June). Survey of how public health doctors in the United Kingdom and Republic of Ireland investigate the effects of long term exposure to point sources of chemicals. *Communicable Disease and Public Health*, 3(2), 127-131.
- Conners-Burrow, N., Johnson, B., & Whiteside-Mansell, L. (2009). Maternal substance abuse and children's exposure to violence. *Journal of Pediatric Nursing*, 24(5), 360-368. doi:10.1016/j.pedn.2008.03.006
- Del Bene Davis, A. (2006). *Home environmental health risks of people with developmental disabilities*. University of Maryland – Baltimore. ProQuest 3247724.
- Del, B. D. (2009). Home environmental health risks of people with developmental disabilities living in community-based residential settings: Implications for community-health nurses. *Journal of Community Health Nursing*, 26(4), 183-191. doi:10.1080/07370010903259246
- DeGuzman, P. & Kulbok, P. (2012). Changing Health Outcomes of Vulnerable Populations Through Nursing's Influence on Neighborhood Built Environment: A Framework for Nursing Research. *Journal of Nursing Scholarship*, 44(4), 341-348. doi:10.1111/j.1547-5069.2012.01470.x
- Dellinger, J. A. (2004, July). Exposure assessment and initial intervention regarding fish consumption of tribal members of the Upper Great Lakes Region in the United States. *Environmental Research*, 95(3), 325-340. doi:10.1016/j.envres.2003.07.012
- Desrochers, S., & Sargent, L. (2004). Boundary/Border Theory and Work-Family Integration. *Organization Management Journal*, 1(1), 40-48.
- Dickerman, B., & Liu, J. (2012). Does current scientific evidence support a link between light at night and breast cancer among female night-shift nurses? review of evidence and implications for occupational and environmental health nurses. *Workplace Health & Safety*, 60(6), 273-281. doi:10.3928/21650799-20120529-06
- Dix, K. (2001). Absorption, Distribution, and Pharmacokinetics. In R. I. Kreiger (Ed.), *Handbook of Pesticide Toxicology* (2<sup>nd</sup> ed., Vol. I, pp. 563-582). San Diego, CA: Academic Press.
- Dixon, J., Hendrickson, K., Ercolano, E., Quackenbush, R., & Dixon, J. (2009). The environment health engagement profile: what people think and do about environmental health. *Public Health Nursing*, 26(5), 460-473. doi:10.1111/j.1525-1446.2009.00804.x
- Duderstadt, K. G. (2009). Chemical policy and the impact on child health. *Journal of Pediatric Health Care: Official Publication of National Association of Pediatric Nurse Associates & Practitioners*, 23(6), 421-424. doi:10.1016/j.pedhc.2009.08.005
- Duffy, S. A., Missel, A. L., Waltje, A. H., Ronis, D. L., Fowler, K. E., & Hong, O. (2011). Health behaviors of operating engineers. *AAOHN Journal: Official Journal of the American Association of Occupational Health Nurses*, 59(7), 293-301. doi:10.3928/08910162-20110616-01
- Eaton, D. L. (2005). Toxicology. In L. Rosenstock, M. R. Cullen, C. A. Brodtkin & C. A. Redlich (Eds.), *Textbook of Clinical Occupational and Environmental Medicine* (2nd ed., pp. 83-118). Philadelphia, PA: Elsevier Saunders.
- Eisenberg, S. (2009). Safe handling and administration of antineoplastic chemotherapy. *Journal of Infusion Nursing*, 32(1), 23-32. doi:10.1097/NAN.0b013e31819246e0
- Elliott, P., & Wartenberg, D. (2004, June). Spatial Epidemiology: Current Approaches and Future Challenges. *Environmental Health Perspectives*, 112(9), 998-1006.

- Fayram, E. (2009). Applied Epidemiology for Public Health and Community-Based Nurses. *The Journal of Continuing Education in Nursing*, 40(8), 361-366. doi:10.3928/00220124-20090723-05
- Firenze, R. J. (1978). *The Process of Hazard Control*. Dubuque, IA: Kendall/Hunt Publishing Company.
- Fox, N. (2011). Boundary Objects, Social Meanings and the Success of New Technologies. *Sociology*, 45(1), 70-85. doi:10.1177/003803038510387196
- Gates, D. M., & Jones, M. S. (2007). A pilot study to prevent hearing loss in farmers. *Public Health Nursing*, 24(6), 547-553.
- Gee, G. C., & Payne-Sturges, D. C. (2004, December). Environmental Health Disparities: A Framework Integrating Psychosocial and Environmental Concepts. *Environmental Health Perspectives*, 112(17), 1645-1653.
- Geiger-Brown, J., & Lipscomb, J. (2010). The health care work environment and adverse health and safety consequences for nurses. *Annual Review of Nursing Research*, 28, 191-231.
- Gilden, R. C. (2010). Pesticides use in hospitals: Health protection, health hazards, and viable alternatives. *Nursing Administration Quarterly*, 34(4), 320-326. doi:10.1097/NAQ.0b013e3181f56330
- Gilden, R. C., Huffling, K., & Sattler, B. (2010). Pesticides and health risks. *Journal of Obstetric, Gynecologic, and Neonatal Nursing: JOGNN / NAACOG*, 39(1), 103-110. doi:10.1111/j.1552-6909.2009.01092.x
- Gilden, R., Friedmann, E., Sattler, B., Squibb, K., & McPhaul, K. (2012). Potential health effects related to pesticide use on athletic fields. *Public Health Nursing*, 29(3), 198-207. doi:10.1111/j.1525-1446.2012.01016.x
- Gillespie, G. L., Bresler, S., Gates, D. M., & Succop, P. (2013). Posttraumatic stress symptomatology among emergency department workers following workplace aggression. *Workplace Health & Safety*, 61(6), 247-254. doi:10.3928/21650799-20130516-07
- Gonzales, M. (2015). *Epigenetic risk factors in women with breast cancer: a family case-control study*. Azusa Pacific University. ProQuest 3722703.
- Graham, S. E., & McCurdy, T. (2004). Developing meaningful cohorts for human exposure models. *Journal of Exposure Analysis and Environmental Epidemiology*, 14, 23-43.
- Graff, J. C., Murphy, L., Ekvall, S., & Gagnon, M. (2006). In-home toxic chemical exposures and children with intellectual and developmental disabilities. *Pediatric Nursing*, 32(6), 596-603.
- Gray, S., Akol, H. A., & Sundal, M. (2008). Mixed-longitudinal growth of breastfeeding children in moroto district, uganda (karamoja subregion). A loss of biological resiliency? *American Journal of Human Biology*, 20(5), 499-509. doi:10.1002/ajhb.20786
- Gregus, Z., & Klaassen, C. D. (2003). Mechanisms of Toxicity. In C. D. Klaassen & J. B. Watkins (Eds.), *Casarett & Doull's Essentials of Toxicology* (pp. 21-45). New York, NY: McGraw-Hill.
- Grota, P. G., Meinzen, S., & Burleson-Rine, P. (2009). HIPP lead to self-health: Healthy infection prevention practices in intensive care units. *Critical Care Nursing Quarterly*, 32(3), 242-250. doi:10.1097/CNQ.0b013e3181ab9273
- Guarnaccia, P. J. (1984). *Asthma in a low income community: the correlates of illness severity and health system utilization*. University of Connecticut. ProQuest 8418819.

- Guo, S., Ratner, P. A., Johnson, J. L., Okoli, C. T. C., & Hossain, S. (2010). Correlates of smoking among adolescents with asthma. *Journal of Clinical Nursing, 19*(5-6), 701-711. doi:10.1111/j.1365-2702.2009.03096.x
- Hackley, B., Feinstein, A., & Dixon, J. (2007). Air pollution: Impact on maternal and perinatal health. *Journal of Midwifery & Women's Health, 52*(5), 435-443.
- Hahn, E. J., Ashford, K. B., Okoli, C. T. C., Rayens, M. K., Ridner, S. L., & York, N. L. (2009). Nursing research in community-based approaches to reduce exposure to secondhand smoke. *Annual Review of Nursing Research, 27*, 365-391.
- Hawrychuk Ducharme. (2011). *Workplace and Occupational Aggression in First Nations and Inuit Health Nursing Stations in Manitoba Region: Incidence, Types and Patterns*. University of Manitoba. ProQuest 3474925.
- Heath, N., Canetti, D., Hall, B., & Hobfoll, S. (2013). Exposure to Political Violence, Psychological Distress, Resource Loss, and Benefit Finding as Predictors of Domestic Violence Among Palestinians. *Psychological Trauma: Theory, Research, Practice, and Policy, 5*(4), 366-376. doi:10.1037/a0028367
- Higgins, P. A., Winkelman, C., Lipson, A. R., Guo, S., & Rodgers, J. (2007). Light measurement in the hospital: A comparison of two methods. *Research in Nursing & Health, 30*(1), 120-128.
- Hirata, H., & Harvath, T. A. (2015). The relationship between exposure to dementia-related aggressive behavior and occupational stress among Japanese care workers. *Journal of Gerontological Nursing, 41*(4), 38-46. doi:10.3928/00989134-20141014-01
- Hong, O., Fiola, L. A., & Feld, J. (2013). Challenges and successes in recruiting firefighters for hearing loss prevention research. *Workplace Health & Safety, 61*(6), 257-263. doi:10.3928/21650799-20130516-08
- Hong, O., Ronis, D. L., & Antonakos, C. L. (2011). Validity of self-rated hearing compared with audiometric measurement among construction workers. *Nursing Research, 60*(5), 326-332. doi:10.1097/NNR.0b013e3182281ca0
- Hood, J., & Larrañaga, M. (2007). Employee health surveillance in the health care industry. *AAOHN Journal, 55*(10), 423-431.
- Howett, M., Connor, A., & Downes, E. (2010). Nightingale Theory and Intentional Comfort Touch in Management of Tinea Pedis in Vulnerable Populations. *Journal of Holistic Nursing, 28*(4), 244-250. doi:10.1177/0898010110373655
- Hughes, N. L., Nelson, A., Matz, M. W., & Lloyd, J. (2011). AORN ergonomic tool 4: Solutions for prolonged standing in perioperative settings. *AORN Journal, 93*(6), 767-774. doi:10.1016/j.aorn.2010.08.029
- Irish, D. D. (1973). The significance of the occupational environment as a part of the total ecological system. In G. D. Clayton, & W. D. Kelley (Eds.), *the Industrial Environment -- its Evaluation & Control* (pp. 7-10). Washington, DC: U.S. Government Printing Office.
- Ivicek, K., de Castro, A.B., Salazar, M. K., Murphy, H. H., & Keifer, M. (2011). Using problem-based learning for occupational and environmental health nursing education: Pesticide exposures among migrant agricultural workers. *AAOHN Journal, 59*(3), 127-133. doi:10.3928/08910162-20110216-02
- Jones, E. J., & Appel, S. J. (2008). Type 2 diabetes: Fueling the surge of cardiovascular disease in women. *Nursing for Women's Health, 12*(6), 500-513. doi:10.1111/j.1751-486X.2008.00384.x

- Jorissen, J. (2007). Literature review. outcomes associated with postnatal exposure to polychlorinated biphenyls (PCBs) via breast milk. *Advances in Neonatal Care*, 7(5), 230-237.
- Kelley, M. A., Flocks, J. D., Economos, J., & McCauley, L. A. (2013). Female farmworkers' health during pregnancy: Health care providers' perspectives. *Workplace Health & Safety*, 61(7), 308-313. doi:10.3928/21650799-20130617-07
- Krimsky, S., & Golding, D. (1992). *Social Theories of Risk*. Westport, CT: Praeger Publishers.
- Leduc-Souville, B., Bertrand, E., & Schlatter, J. (2013). Risk Management of Excreta in a Cancer Unit. *Clinical Journal of Oncology Nursing*, 17(3), 248-252. doi:10.1188/13.CJON.248-252
- Kub, J., Jennings, J. M., Donithan, M., Walker, J. M., Land, C. L., & Butz, A. (2009). Life events, chronic stressors, and depressive symptoms in low-income urban mothers with asthmatic children. *Public Health Nursing*, 26(4), 297-306. doi:10.1111/j.1525-1446.2009.00784.x
- Kuntz, S. W., Ricco, J. A., Hill, W. G., & Anderko, L. (2010). Communicating methylmercury risks and fish consumption benefits to vulnerable childbearing populations. *Journal of Obstetric, Gynecologic, and Neonatal Nursing*, 39(1), 118-126. doi:10.1111/j.1552-6909.2009.01094.x
- Kuntz, S. W., Winters, C. A., Hill, W. G., Weinert, C., Rowse, K., Hernandez, T., & Black, B. (2009). Rural public health policy models to address an evolving environmental asbestos disaster. *Public Health Nursing*, 26(1), 70-78. doi:10.1111/j.1525-1446.2008.00755.x
- Larsson, L. S. (2014). Risk-reduction strategies to expand radon care planning with vulnerable groups. *Public Health Nursing*, 31(6), 526-536. doi:10.1111/phn.12111
- Lee, K., Hahn, E. J., Riker, C. A., Hoehne, A., White, A., Greenwell, D., & Thompson, D. (2007). Secondhand smoke exposure in a rural high school. *The Journal of School Nursing*, 23(4), 222-228.
- Leonard, J. (2012). *Attitudes and Practices of Perioperative Nurses Effecting the Election of Wearing Protection from Occupational Radiation Exposure*. Gardner-Webb University. ProQuest 1541868.
- L'Heureux, J. (2009). Second-hand smoke exposure: Responses from home care and therapeutic group home nurses: A call to action. *Home Healthcare Nurse*, 27(2), 114-119. doi:10.1097/01.NHH.0000346315.54078.be
- Lilienfeld, D. E., & Stolley, P. D. (1994). *Foundation of Epidemiology* (3rd ed.) New York, NY: Oxford University Press.
- Lindberg, S., Bullock, R., Ebinghaus, R., Engstrom, D., Feng, X., Fitzgerald, W., ... Panel on Source Attribution of Atmospheric Mercury. (2007, February). A Synthesis of Progress and Uncertainties in Attributing the Sources of Mercury in Deposition. *Ambio*, 36(1), 19-32.
- Linke, A., & O'Loughlin, J. (2015). Reconceptualizing, Measuring, and Evaluating Distance and Context in the Study of Conflicts: Using Surveys. *International Studies Review*, 17(1), 107-125.
- Lioy, P. J. (1990). Assessing total human exposure to contaminants. *Environmental Science & Technology*, 24(7), 938-945.
- Lioy, P., Lebre, E., Spengler, J., Brauer, M., Buckley, T., & Freeman, N. et al. (2005). Defining Exposure Science. *Journal of Exposure Analysis and Environmental Epidemiology*, 15, 463.
- Liu, J., Chen, X., & Lewis, G. (2011). Childhood internalizing behavior: Analysis and implications. *Journal of Psychiatric and Mental Health Nursing*, 18(10), 884-894. doi:10.1111/j.1365-2850.2011.01743.x

- Liu, J., McCauley, L., Leung, P., Wang, B., Needleman, H., & Pinto-Martin, J. (2011). Community-based participatory research (CBPR) approach to study children's health in china: Experiences and reflections. *International Journal of Nursing Studies*, *48*(7), 904-913. doi:10.1016/j.ijnurstu.2011.04.003
- Liu, J., & Schelar, E. (2012). Pesticide exposure and child neurodevelopment: summary and implications. *Workplace Health & Safety*, *60*(5), 235-242. doi:10.3928/21650799-20120426-73
- Longo, B. M. (2009). The kilauea volcano adult health study. *Nursing Research*, *58*(1), 23-31. doi:10.1097/NNR.0b013e3181900cc5
- Lyon, D., Starkweather, A., Montpetit, A., Menzies, V. & Jallo, N. (2014). A biobehavioral perspective on telomere length and the exposome. *Biological Research for Nursing*, *16*(4), 448-455. doi:10.1177/1099800414522689
- Maas, T., Dompeling, E., Muris, J., Wesseling, G., Knottnerus, J. A., & van Schayck, O.C.P. (2013). Prevention of asthma in genetically susceptible children: a multifaceted intervention trial focused on feasibility in general practice. *Pediatric Allergy and Immunology*, *22*, 794-802. doi:10.1111/j.1399-3038.2011.01192.x
- MacMahon, B., & Pugh, T. F. (1970). *Epidemiology: Principles and Methods*. Boston, MA: Little, Brown and Company.
- Magasi, S., Wong, A., Gray, D., Hammel, J., Baum, C., Wang, C.-C., & Heinemann, A. (2015). Theoretical Foundations for the Measurement of Environmental Factors and Their Impact on Participation Among People with Disabilities. *Archives of Physical Medicine and Rehabilitation*, *96*, 569-577. doi:10.1016/j.apmr.2014.12.002
- Maguire-Eisen, M. (2013). Skin cancer: A growing health problem for children. *Seminars in Oncology Nursing*, *29*(3), 206-213. doi:10.1016/j.soncn.2013.06.006
- Mahon, N. E., Yarcheski, A., Yarcheski, T. J., & Hanks, M. M. (2010). A meta-analytic study of predictors of anger in adolescents. *Nursing Research*, *59*(3), 178-184. doi:10.1097/NNR.0b013e3181dbba04
- Malinauskiene, V., Leisyte, P., Romualdas, M., & Kirtiklyte, K. (2011). Associations between self-rated health and psychosocial conditions, lifestyle factors and health resources among hospital nurses in Lithuania. *Journal of Advanced Nursing*, *67*(11), 2383-2393. doi:10.1111/j.1365-2648.2011.05685.x
- Matook, S. A., Sullivan, M. C., Salisbury, A., Miller, R. J., & Lester, B. M. (2010). Variation of NICU sound by location and time of day. *Neonatal Network*, *29*(2), 87-95.
- Mazer, M. E., Vann, J. C. J., Lamanna, B. F., & Davison, J. (2014). Reducing children's exposure to school bus diesel exhaust in one school district in North Carolina. *The Journal of School Nursing*, *30*(2), 88-96. doi:10.1177/1059840513496429
- McCauley, L. A. (2010). Environments and health: Will the BP oil spill affect our health? *The American Journal of Nursing*, *110*(9), 54-56. doi:10.1097/01.NAJ.0000388266.51213.42
- McDermott-Levy, R., & Fazzini, C. (2010). Identifying the key personnel in a nurse-initiated hospital waste reduction program. *Nursing Administration Quarterly*, *34*(4), 306-310. doi:10.1097/NAQ.0b013e3181f60a66
- McDermott-Levy, R., Kaktins, N., & Sattler, B. (2013). Fracking, the environment, and health. *The American Journal of Nursing*, *113*(6), 45-51. doi:10.1097/01.NAJ.0000431272.83277.f4



- McElroy, K. G. (2010). Environmental health effects of concentrated animal feeding operations: Implications for nurses. *Nursing Administration Quarterly*, 34(4), 311-319. doi:10.1097/NAQ.0b013e3181f5649c
- McNall, L., Scott, L., & Nicklin, J. (2015). Do positive affectivity and boundary preferences matter for work-family enrichment? A study of human service workers. *Journal of Occupational Health Psychology*, 20(1), 93-104. doi:10.1037/a0038165
- Medinsky, M. A., & Valentine, J. L. (2003). Toxicokinetics. In C. D. Klaassen & J. B. Watkins (Eds.), *Casarett and Doull's Essentials of Toxicology* (pp. 98-107). New York, NY: McGraw-Hill.
- Mejia, E. A., & Sattler, B. (2009). Starting a health care system green team. *AORN Journal*, 90(1), 33-40. doi:10.1016/j.aorn.2009.03.001
- Molina, A. J., Fernández, D., Delgado, M., & Martín, V. (2010). Sensitivity and specificity of a self-administered questionnaire of tobacco use; including the Fagerström test. *International Journal of Nursing Studies*, 47(2), 181-189. doi:10.1016/j.ijnurstu.2009.05.022
- Nachreiner, N. M., Hansen, H. E., Okano, A., Gerberich, S. G., Ryan, A. D., McGovern, P. M., ... Watt, G. D. (2007). Difference in work-related violence by nurse license type. *Journal of Professional Nursing*, 23(5), 290-300.
- National Research Council. (2000). *Scientific Frontiers in Developmental Toxicity and Risk Assessment*. Washington, DC: National Academy Press.
- National Research Council. (1991). *Environmental Epidemiology, Volume 1: Public Health and Hazardous Wastes*. Washington, DC: National Academy Press.
- Needham, L. L., & Sexton, K. (2000). Assessing children's exposure to hazardous environmental chemicals: an overview of selected research challenges and complexities. *Journal of Exposure Analysis and Environmental Epidemiology*, 10, 611-629.
- Needleman, H. L., & Bellinger, D. (1994). *Prenatal Exposure to Toxicants: Developmental Consequences*. Baltimore, MD: The Johns Hopkins University Press.
- Newcomb, P., & Li, J. (2008). Predicting admissions for childhood asthma based on proximity to major roadways. *Journal of Nursing Scholarship*, 40(4), 319-325. doi:10.1111/j.1547-5069.2008.00245.x
- Nouredini, S. (2015). *Predictors of Safe Work Behavior and Central Nervous System Toxicity Symptoms in the Dry-Cleaner Workforce*. University of California - San Francisco. ProQuest 3712761.
- Okoli, C. T. C., Browning, S., Rayens, M. K., & Hahn, E. J. (2008). Secondhand tobacco smoke exposure, nicotine dependence, and smoking cessation. *Public Health Nursing*, 25(1), 46-56. doi:10.1111/j.1525-1446.2008.00679.x
- Pak, V. M., & McCauley, L. A. (2007). Risks of phthalate exposure among the general population: Implications for occupational health nurses. *AAOHN Journal*, 55(1), 12-17.
- Pak, V., Nailon, R., & McCauley, L. (2007). Neonatal Exposure to Plasticizers in the NICU. *Maternal Child Nursing*, 32(4), 244-249.
- Pak, V. M., O'Hara, M., & McCauley, L. A. (2008). Health effects following 9/11: Implications for occupational health nurses. *AAOHN Journal: Official Journal of the American Association of Occupational Health Nurses*, 56(4), 159-165.
- Parkes, M., Panelli, R., & Weinstein, P. (2003, May). Converging paradigms for environmental health theory and practice. *Environmental Health Perspectives*, 111(5), 669-675.

- Pekkanen, J., & Pearce, N. (2001, January). Environmental Epidemiology: Challenges and Opportunities. *Environmental Health Perspectives*, 109(1), 1-5.
- Perron, A., & O'Grady, K. (2010). Applying Dixon and Dixon's Integrative Model for Environmental Health Research Toward a Critical Analysis of Childhood Lead Poisoning in Canada. *Advances in Nursing Science*, 33(10), E1-E6.
- Phillips, J. A. (2014). Industrialized farm animal production: Health concerns. *Workplace Health & Safety*, 62(5), 216-216. doi:10.3928/21650799-20140422-07
- Pleil, J., & Sobus, J. (2013). Estimating Lifetime Risk from Spot Biomarker Data and Intraclass Correlation Coefficients (ICC). *Journal of Toxicology and Environmental Health, Part A*, 76(12), 747-766. doi:10.1080/15287394.2013.821394
- Pope, A. M., Snyder, M. A., & Mood, L. H. (1995). *Nursing, Health & Environment: Strengthening the Relationship to Improve the Public's Health*. Washington, DC: National Academy Press.
- Postma, J., Butterfield, P. W., Odom-Maryon, T., Hill, W., & Butterfield, P. G. (2011). Rural children's exposure to well water contaminants: Implications in light of the American Academy of Pediatrics' recent policy statement. *Journal of the American Academy of Nurse Practitioners*, 23(5), 258-265. doi:10.1111/j.1745-7599.2011.00609.x
- Prentice, R. L., & Thomas, D. (1993). Methodologic Research Needs in Environmental Epidemiology Data Analysis. *Environmental Health Perspectives*, 101(S-4), 39-48.
- Quansah, R., & Jaakkola, J. (2010). Occupational Exposures and Adverse Pregnancy Outcomes Among Nurses: A Systematic Review and Meta-Analysis. *Journal of Women's Health*, 19(10), 1851-1862. doi:10.1089/jwh2009.1876
- Robertson, C., Kerr, M., Garcia, C., & Halterman, E. (2007). Noise and hearing protection: Latino construction workers' experiences. *AAOHN Journal*, 55(4), 153-160.
- Rogers, B., Stiehl, K., Borst, J., Hess, A., & Hutchins, S. (2007). Heat-related illnesses: The role of the occupational and environmental health nurse. *AAOHN Journal*, 55(7), 279-287.
- Rozman, K. K., Doull, J., & Hayes, W. J. (2001). Dose, Time and Other Factors Influencing Toxicity. In R. I. Kreiger (Ed.), *Handbook of Pesticide Toxicology* (2nd ed., Vol. I, pp. 1-93). San Diego, CA: Academic Press.
- Runyan, C. W. (2003). Back to the Future: revisiting Haddon's conceptualization of injury epidemiology and prevention. *Epidemiologic Reviews*, 25, 60 - 64.
- Sachiyo, K., Kumiko, A., Keiko, N., Kaori, K., & Sonomi, O. (2012). Effect of Passive Smoking Using Maternal and Neonatal Salivary Cotinine Measurements. *Nursing Research*, 61(2), 140-144. doi:10.1097/NNR.0b013e3182456690
- Sayre, L., Rhazi, N., Carpenter, H., & Hughes, N. L. (2010). Climate change and human health: The role of nurses in confronting the issue. *Nursing Administration Quarterly*, 34(4), 334-342. doi:10.1097/NAQ.0b013e3181f60df9
- Schnur, J., & John, R.M. (2014). Childhood lead poisoning and the new Centers for Disease Control and Prevention guidelines for lead exposure. *Journal of the American Association of Nurse Practitioners*, 26, 238-247. doi:10.1002/2327-6924.12112
- Seomun, G., Kim, Y., Lee, J., Jeong, K., Park, S., Kim, M., & Noh, W. (2014). Descriptive study of electromagnetic wave distribution for various seating positions: Using digital textbooks. *The Journal of School Nursing*, 30(2), 123-128. doi:10.1177/1059840513491500

- Severston, D. (2013). The Influence of Environmental Hazard Maps on Risk Beliefs, Emotion and Health-Related Behavioral Intentions. *Research in Nursing & Health*, 36, 330-348. doi:10.1002/nur.21544
- Sexton, K., & Hattis, D. (2007, May). Assessing Cumulative Health Risks from Exposure to Environmental Mixtures - Three Fundamental Questions. *Environmental Health Perspectives*, 115(5), 825-832. doi:10.1289/ehp.9333
- Sexton, K., Beck, B. D., Bingham, E., Brain, J. D., DeMarini, D. M., Hertzberg, R. C., ... Pounds, J. G. (1995c, December 28). Chemical mixtures from a public health perspective: the importance of research for informed decision-making. *Toxicology*, 105(2-3), 429-441.
- Shendell, D., Alexander, M., & Huang, Y. Community Environmental Quality Knowledge and Awareness among Nurses: developing and piloting an assessment survey in schools. *Pediatric Nursing*, 36(1), 18-24.
- Smith, C. (2012). *Exploring Adolescent Employees' Perceptions of Safety from Workplace Violence*. University of Cincinnati. ProQuest 3554391.
- Smith, F. D. (2010). Management of exposure to waste anesthetic gases. *AORN Journal*, 91(4), 482-494. doi:10.1016/j.aorn.2009.10.022
- Smith, M. (2001). The Face of Nature: Environmental Ethics and the Boundaries of Contemporary Social Theory. *Current Sociology*, 49(1), 49-65.
- Smith, R. (2009). What you don't know can hurt you: health hazards in the work environment. *Journal of PeriAnesthesia Nursing*, 24(2), 75-80. doi:10.1016/j.jopan.2008.11.005
- Speaks, J. T., Thomas, E. C., & Thompson, L. M. (2012). Household air pollution from cooking fires: A challenge for nurses globally and a call to action. *Journal of Community Health Nursing*, 29(4), 236-244. doi:10.1080/07370016.2012.726837
- Steinemann, A. (2004). Human exposure, health hazards and environmental regulations. *Environmental Impact Assessment Review*, 24, 695-710.
- Stensgard, K. (2013). *Skin cancer prevention in North Dakota farmers and ranchers*. North Dakota State University. ProQuest 3559523.
- Susser, M., & Susser, E. (1996, May). Choosing a Future for Epidemiology: I. Eras and Paradigms. *American Journal of Public Health*, 86(4), 668-673.
- Suwanwaiphatthana, W., Ruangdej, K., & Turner-Henson, A. (2010). Outdoor air pollution and children's health. *Pediatric Nursing*, 36(1), 25-32.
- Taylor-Ford, R., Catlin, A., LaPlante, M., & Weinke, C. (2008). Effect of a noise reduction program on a medical-surgical unit. *Clinical Nursing Research*, 17(2), 74-88. doi:10.1177/1054773807312769
- Temple, B., & Johnson, J. (2011). Provision of smoke-free homes and vehicles for kindergarten children: Associated factors. *Journal of Pediatric Nursing*, 26(6), e69-e78. doi:10.1016/j.pedn.2011.01.001
- Thain, W. (1980). *Monitoring Toxic Gases in the Atmosphere for Hygiene and Pollution Control*. Oxford, UK: Pergamon Press.
- Thomas, K. A., & Uran, A. (2007). How the NICU environment sounds to a preterm infant: Update. *American Journal of Maternal Child Nursing*, 32(4), 250-253.

- Thompson, M. R. (2011). *Exposures to multiple environmental chemicals (lead, methylmercury and polychlorinated biphenyls) among childbearing-aged women in U.S.* University of Rhode Island. ProQuest 3449440.
- Thompson, M., Ellis, R., & Wildavsky, A. (1990). *Cultural Theory*. Boulder, CO: Westview Press.
- Tickner, J. A. (2005). Prevention. In H. Frumkin (Ed.), *Environmental Health: from global to local* (pp. 849-894). San Francisco, CA: Josey-Bass.
- Toth, D., & DiBenedetto, D. V. (2003, July). A Standardized Language for Occupational Health Nursing - The Nursing Minimum Data Set. *AAOHN Journal*, 51(7), 283-286.
- Tullai-McGuinness, S., Ballard, K. A., Gallagher, R. M., & Carpenter, H. (2010). Nurse administrators: Leading environmental change. *Nursing Administration Quarterly*, 34(4), 282-288. doi:10.1097/NAQ.0b013e3181f56300
- Von Rueden, K., T., Hinderer, K. A., McQuillan, K. A., Murray, M., Logan, T., Kramer, B., . . . Friedmann, E. (2010). Secondary traumatic stress in trauma nurses: Prevalence and exposure, coping, and personal/environmental characteristics. *Journal of Trauma Nursing*, 17(4), 191-200. doi:10.1097/JTN.0b013e3181ff2607
- Watts, B. (2009). Outpatient management of asthma in children age 5-11 years: Guidelines for practice. *Journal of the American Academy of Nurse Practitioners*, 21(5), 261-269. doi:10.1111/j.1745-7599.2009.00403.x
- Willemsen-McBride, T., & Gehan, K. (2009). Safe handling of cytotoxic agents: A team approach. *AORN Journal*, 90(5), 731. doi:10.1016/j.aorn.2009.06.021
- Workman, M. L., & Winkelman, C. (2008). Genetic influences in common respiratory disorders. *Critical Care Nursing Clinics of North America*, 20(2), 171. doi:10.1016/j.ccell.2008.01.009
- Worthington, S., Armstrong, K., & Debevec, E. (2010). The green choices project: Integrating environmental health education into reproductive health care settings. *Nursing Administration Quarterly*, 34(4), 289-296. doi:10.1097/NAQ.0b013e3181f56356
- York, N. L., & Lee, K. (2010). A baseline evaluation of casino air quality after enactment of Nevada's clean indoor air act. *Public Health Nursing*, 27(2), 158-163. doi:10.1111/j.1525-1446.2010.00843.x
- Zerubavel, E. (1996). Lumping and Splitting: Notes on Social Classification. *Sociological Forum*, 11(3S), 421-433.
